# Supplementary material for: Using Wearable Data to Detect Depression in a Cross-Population Study
Source: Research Square preprint supplement (doi:10.21203/rs.3.rs-8405331/v1), 2026-01-09
Supplement: Supplementary file 1 [file a76db5dcb391b883867dbe7e.pdf]

## Using Wearable Data to Predict Depression in a Cross-Population Study

### Supplementary Material

#### Adapted PHQ-9 in the [masked] A Study

Table 1 shows the adapted PHQ-9 (Kroenke et al., 2001) asked in the baseline survey (Stage 1) in the [masked] A study. For [masked] A, any items from the original PHQ-9 that aggregate different symptoms were disaggregated. Specifically, the disaggregated symptoms were: sad mood and hopelessness (originally PHQ-9 item 2); insomnia and hypersomnia (originally PHQ-9 item 3), appetite loss and overeating (originally PHQ-9 item 5), and motor agitation and retardation (originally PHQ-9 item 8). Disaggregating these items allows for a more differentiated understanding of people's problems. Additionally, a question about the commonly experienced symptom libido loss was added<sup>1</sup>.

From the adapted version, a person's original PHQ-9 sum score can be deduced. The additional symptom (libido loss) is not used. The other items are summed; for each original PHQ-9 item, the maximum value of the two items it was disaggregated into is used.

**Table 1**

*Adapted PHQ-9 in the [masked] A Baseline Survey*

| Construct              | Variable        | Question                                                                              |
|------------------------|-----------------|---------------------------------------------------------------------------------------|
| Anhedonia              | phq1_anhedo     | Little interest or pleasure in doing things                                           |
| Sad Mood               | phq2_sad        | Feeling down or depressed                                                             |
| Hopelessness           | phq2_hopeless   | Feeling hopeless                                                                      |
| Insomnia               | phq3_insomnia   | Trouble falling asleep or staying asleep                                              |
| Hypersomnia            | phq3_hypersom   | Sleeping too much                                                                     |
| Tiredness              | phq4_tired      | Feeling tired or having little energy                                                 |
| Decreased Appetite     | phq5_appet_loss | Poor appetite                                                                         |
| Overeating             | phq5_overeat    | Overeating                                                                            |
| Worthlessness          | phq6_worthless  | Feeling bad about myself – or that I'm a failure or have let myself or my family down |
| Concentration Problems | phq7_concentr   | Trouble concentrating on things, such as reading or watching television               |
| Motor Retardation      | phq8_retar      | Moving or speaking so slowly that other people could have noticed                     |
| Motor Agitation        | phq8_agitate    | Being so fidgety or restless that I have been moving around a lot more than usual     |
| Irritability           | phq11_irrit     | Feeling irritable                                                                     |
| Decreased Libido       | phq12_libido    | Little interest in sex                                                                |
| Suicidal Ideation      | phq9_suicide    | Thoughts that I would be better off dead or of hurting myself in some way             |
| Pseudo PHQ-9 sum score | pseudo_phq9_sum | Calculated based on this formula:                                                     |

<sup>1</sup> Of note, in the EMA period (Stage 2) of [masked] A, an item asking about the commonly experienced symptom of irritability was also added to the adapted PHQ-9. In the baseline (Stage 1) and follow-ups (Stage 3), this was not done, as a corresponding item from the GAD-7 (Spitzer et al., 2006) was available (“gad6\_annoyed”).

---

sum(phq1\_anhedo, max(phq2\_sad, phq2\_hopeless), max(phq3\_insomnia, phq3\_hypersom), phq4\_tired, max(phq5\_appet\_loss, phq5\_overeat), phq6\_worthless, phq7\_concentr, max(phq8\_retar, phq8\_agitate), phq9\_suicide)

---

**Note.** These items were presented with the overarching question “Over the past 2 weeks, how often have you been bothered by the following problems?”; all variables were rated on a four-point scale ranging from 0 to 4 with the answer options: “Not at all”, “Several days”, “More than half the days”, and “Nearly every day”. The pseudo PHQ-9 sum score ranges from 0 to 27, with higher scores indicating higher depression severity.

**Figure 1**

*Flowchart of Participant Exclusions for the Final Sample*

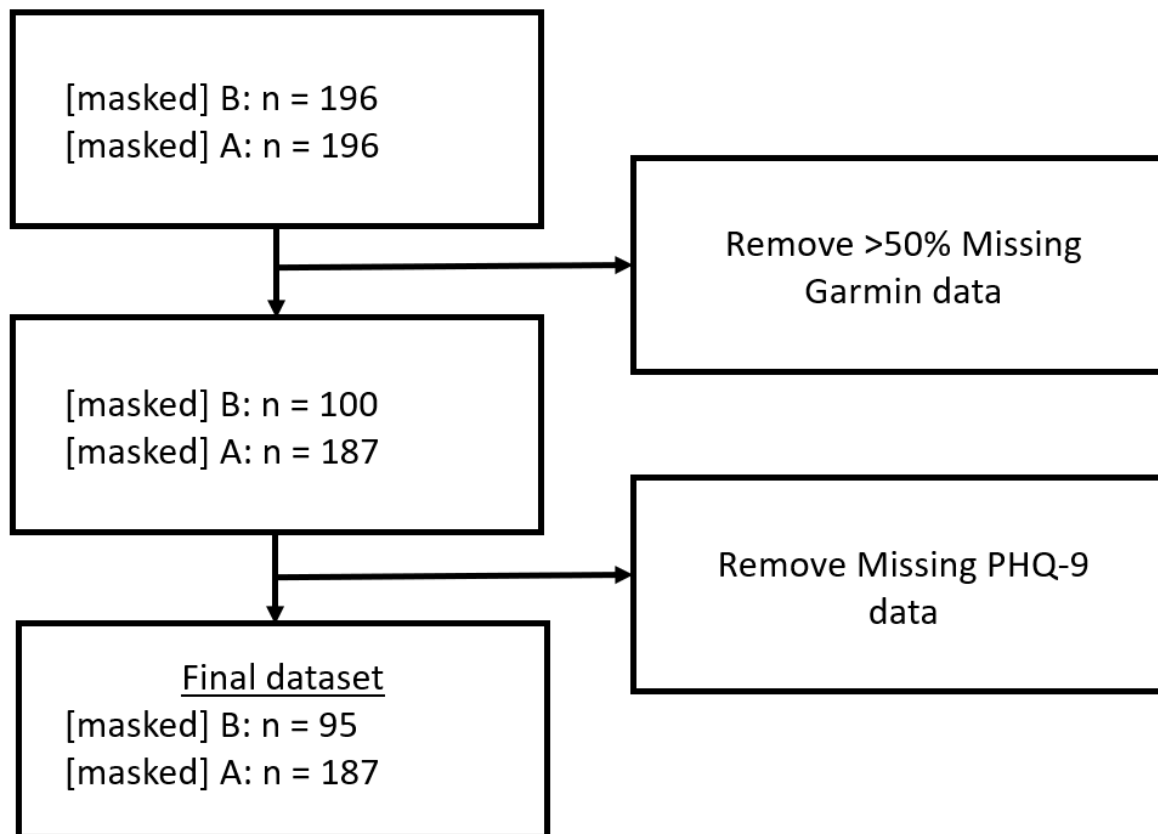

**Note.** Missing data in this study was handled by excluding participants 1) with missing PHQ-9 scores or 2) if wearable data coverage was below 50% for any given feature.

**Table 2***Descriptive Statistics of Predictor Variables Across [masked] B and [masked] A Datasets*

|                                              | [masked] A<br>(n = 187)<br><i>M (SD)</i> | [masked] B<br>(n = 95)<br><i>M (SD)</i> | <i>p</i> |
|----------------------------------------------|------------------------------------------|-----------------------------------------|----------|
| <b>Variable</b>                              |                                          |                                         |          |
| <b>Steps</b>                                 |                                          |                                         |          |
| Mean                                         | 6070 (2558)                              | 6855 (2642)                             | 0.018    |
| Minimum                                      | 1218 (1436)                              | 1834 (1629)                             | 0.002    |
| Maximum                                      | 12746 (4872)                             | 12662 (4753)                            | 0.889    |
| SD                                           | 3332 (1293)                              | 3165 (1337)                             | 0.328    |
| <b>Sleep (in minutes)</b>                    |                                          |                                         |          |
|                                              |                                          |                                         | <        |
| Mean                                         | 511 (51.2)                               | 477 (54.4)                              | 0.001    |
| Minimum                                      | 368 (72.4)                               | 337 (103)                               | 0.012    |
|                                              |                                          |                                         | <        |
| Maximum                                      | 642 (82.8)                               | 604 (77.7)                              | 0.001    |
| SD                                           | 77.6 (29.8)                              | 82.7 (39.2)                             | 0.266    |
| <b>Start time (in minutes from midnight)</b> |                                          |                                         |          |
|                                              |                                          |                                         | <        |
| Mean                                         | 698 (344)                                | 1090 (295)                              | 0.001    |
|                                              |                                          |                                         | <        |
| SD                                           | 527 (151)                                | 257 (263)                               | 0.001    |
| <b>Stop Time (minutes from midnight)</b>     |                                          |                                         |          |
|                                              |                                          |                                         | <        |
| Mean                                         | 529 (69.5)                               | 372 (97.7)                              | 0.001    |
| SD                                           | 80.7 (27.5)                              | 84.0 (72.5)                             | 0.66     |
| <b>Awake HR</b>                              |                                          |                                         |          |
| Mean                                         | 80.8 (7.75)                              | 80.9 (8.24)                             | 0.95     |
| Minimum                                      | 61.4 (7.66)                              | 59.8 (7.47)                             | 0.084    |
|                                              |                                          |                                         | <        |
| Maximum                                      | 112 (7.55)                               | 133 (23.0)                              | 0.001    |
|                                              |                                          |                                         | <        |
| SD                                           | 12.1 (1.87)                              | 13.9 (3.04)                             | 0.001    |
| <b>Resting HR</b>                            |                                          |                                         |          |
|                                              |                                          |                                         | <        |
| Mean                                         | 63.7 (7.75)                              | 71.9 (8.88)                             | 0.001    |
|                                              |                                          |                                         | <        |
| Minimum                                      | 55.4 (7.30)                              | 60.4 (8.20)                             | 0.001    |
|                                              |                                          |                                         | <        |
| Maximum                                      | 83.1 (9.02)                              | 98.8 (15.2)                             | 0.001    |
|                                              |                                          |                                         | <        |
| SD                                           | 5.65 (1.55)                              | 7.90 (2.08)                             | 0.001    |
| Kurtosis                                     | 1.20 (1.91)                              | 0.82 (1.72)                             | 0.085    |
| Skewness                                     | 1.03 (0.54)                              | 0.94 (0.51)                             | 0.157    |

*Note.* *M* = Mean; *SD* = Standard deviation; *HR* = Heart rate.

**Table 3**

*Variable importance and standardized effect sizes for Garmin-derived features predicting depression*

| <b>Variable</b>                | <b>Contribution</b> | <b>Coefficient</b> | <b>Odds Ratio</b> |
|--------------------------------|---------------------|--------------------|-------------------|
| <b>Steps</b>                   |                     |                    |                   |
| Mean                           | 0.19                | -0.052             | 0.949             |
| Minimum                        | 0.06                | -0.013             | 0.988             |
| Maximum                        | 0.36                | -0.096             | 0.909             |
| SD                             | 0.24                | -0.003             | 0.997             |
| <b>Sleep (in seconds)</b>      |                     |                    |                   |
| Mean                           | 0.24                | -0.132             | 0.876             |
| Minimum                        | 0.05                | -0.115             | 0.892             |
| Maximum                        | 0.09                | -0.014             | 0.986             |
| SD                             | 0.44                | 0.169              | 1.184             |
| <b>Start time (in seconds)</b> |                     |                    |                   |
| Mean                           | 0.004               | 0.087              | 1.091             |
| SD                             | 0.22                | -0.202             | 0.817             |
| <b>Stop time (in seconds)</b>  |                     |                    |                   |
| Mean                           | 0.33                | -0.215             | 0.806             |
| SD                             | 0.02                | 0.037              | 1.038             |
| <b>Awake HR</b>                |                     |                    |                   |
| Mean                           | 0.36                | -0.145             | 0.865             |
| Minimum                        | 0.39                | -0.158             | 0.854             |
| Maximum                        | 0.35                | 0.189              | 1.209             |
| SD                             | 0.23                | 0.131              | 1.140             |
| <b>Resting HR</b>              |                     |                    |                   |
| Mean                           | 0.19                | 0.106              | 1.112             |
| Minimum                        | 0.24                | 0.078              | 1.081             |
| Maximum                        | 0.30                | 0.137              | 1.147             |
| SD                             | 0.06                | 0.108              | 1.114             |
| Kurtosis                       | 0.18                | -0.098             | 0.906             |
| Skewness                       | 0.11                | -0.085             | 0.918             |

***Note.** M = Mean; SD = Standard deviation; HR = Heart rate. We applied an Elastic Net to predict depression from Garmin wearable features. Variable importance was calculated using the caret varImp() function, representing the relative contribution of each predictor to the model's predictive accuracy across cross-validation folds. Standardized coefficients and corresponding odds ratios indicate the direction and magnitude of the effect for each predictor. Because Elastic Net shrinks coefficients and accounts for correlations among predictors, variables with low contribution can still have non-negligible effect sizes. This*

table provides both predictive importance and standardized effects for transparency and interpretability.

**Table 4**

*Confusion matrix for Site-only, Site + Garmin, and Elastic Net (Garmin only)*

| Model         | Prediction | Reference<br>0 | Reference<br>1 |
|---------------|------------|----------------|----------------|
| Elastic Net   | 0          | 40             | 10             |
| Garmin only   | 1          | 8              | 27             |
| Site only     | 0          | 44             | 13             |
|               | 1          | 4              | 24             |
| Elastic Net   | 0          | 43             | 11             |
| Site + Garmin | 1          | 5              | 26             |

**Note.** The Site-only and Site + Garmin models were estimated using logistic regression. The Elastic Net model was trained exclusively on Garmin-derived predictors using regularized regression (elastic net).

**Table 5**

*Sensitivity Analysis of Age and Bedtime Control on Prediction Performance*

|                 | Prediction of Depression<br>controlled for |         |
|-----------------|--------------------------------------------|---------|
|                 | Age                                        | Bedtime |
| <b>Accuracy</b> | 0.74                                       | 0.73    |
| <b>AUC</b>      | 0.76                                       | 0.79    |
| <b>F1 Score</b> | 0.78                                       | 0.76    |

**Note.** AUC = Area under the curve

**Table 6**

*Sensitivity Analysis of Patient Health Questionnaire-9 Cutoff Variation*

|                 | Prediction of Depression<br>for PHQ-9 cutoff |           |
|-----------------|----------------------------------------------|-----------|
|                 | $\geq 9$                                     | $\geq 11$ |
| <b>Accuracy</b> | 0.7                                          | 0.71      |
| <b>AUC</b>      | 0.75                                         | 0.75      |
| <b>F1 Score</b> | 0.7                                          | 0.73      |

**Note.** PHQ-9 = Patient Health Questionnaire-9, AUC = Area under the curve.
